# Supplementary material for: Maintaining the pluripotency of mouse embryonic stem cells on gold nanoparticle layers with nanoscale but not microscale surface roughness
Source: Royal Society of Chemistry journal article supplement (doi:10.1039/c4nr01540a), 2014-01-01
Supplement: c4nr01540a1.pdf [file c4nr01540a1.pdf]

**Supporting Information for**

**Maintaining the pluripotency of mouse embryonic  
stem cells on gold nanoparticle layers with  
nanoscale but not microscale surface roughness**

Zhonglin Lyu, Hongwei Wang, Yanyun Wang, Kaiguo Ding, Huan Liu, Lin Yuan\*,

Xiujuan Shi, Mengmeng Wang, Yanwei Wang, Hong Chen\*

\*The Key Lab of Health Chemistry and Molecular Diagnosis of Suzhou, Department of Polymer  
Science and Engineering, College of Chemistry, Chemical Engineering and Materials Science,

Soochow University, Suzhou 215123, P. R. China

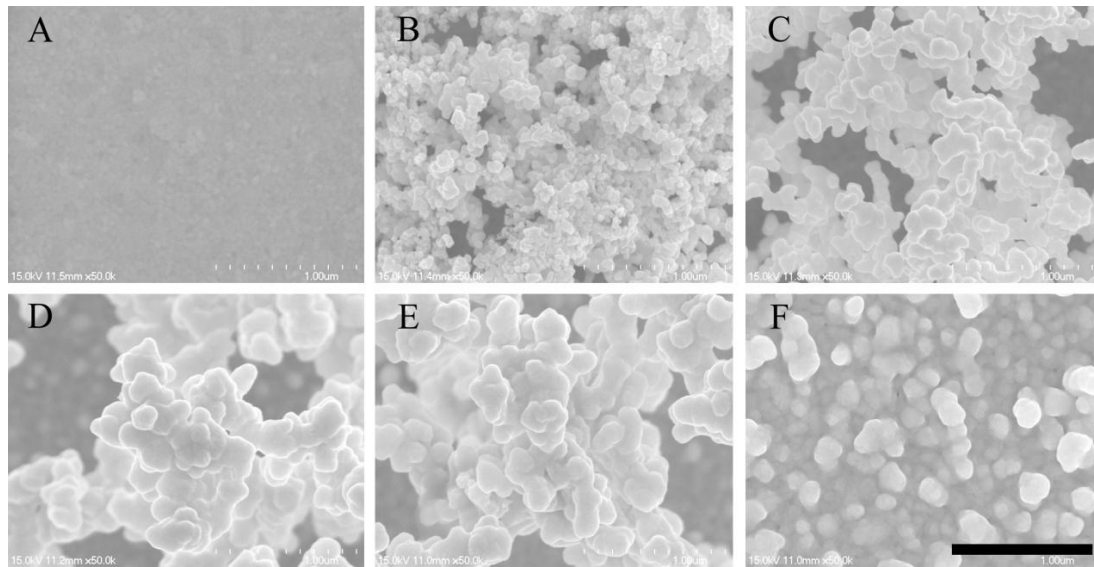

**Fig. 1** Top-view SEM images of the smooth Au and GNPLs with surface roughnesses from nanoscale to microscale. A: Au; B: GL-1; C: GL-2; D: GL-3; E: GL-4; F: GL-5. The three-dimensional structures of the GNPL became more densely aggregated with the increment of the gold plating solution which resulted in the GNPLs with rougher surface morphology. Bar, 1  $\mu$ m.

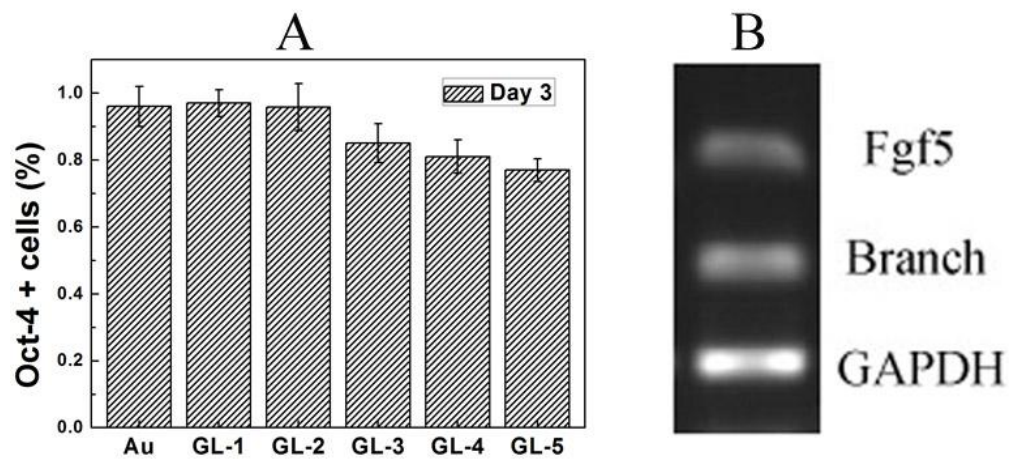

**Fig. 2** A: Percentage of Oct-4 + mESCs on Au and GNPLs with various surface roughnesses after culture of 3 days; Data are the mean  $\pm$  SD (n = 3). B: RT-PCR analysis of the expression of specific germ layer maker genes of mESCs on GL-5 with microscale surface roughness (Rq of 1205 nm) after culture of 7 days. Both the expression of Branchyury (endoderm, middle panel) and Fgf5 (ectoderm, upper panel) were detected which indicated the spontaneous differentiation of the cells cultured on microrough GL-5 was undirectional.

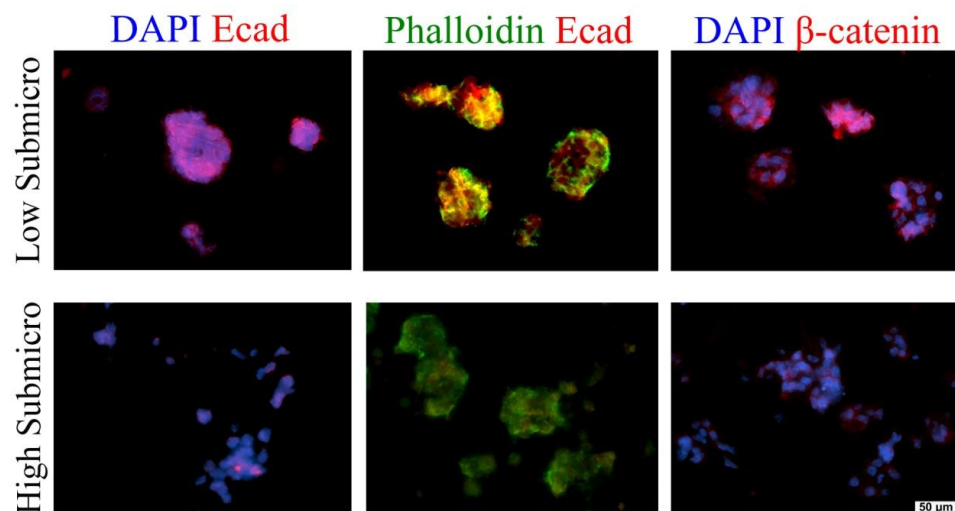

**Fig. 3** Immunofluorescence images of mESCs on GNPLs with low sub-microscale and high sub-microscale surface roughnesses after culture of 3 days. A: The cells were costained for nuclei (DAPI; blue) and E-cadherin (red); B: The cells were costained for cytoskeleton (Phalloidin; green) and E-cadherin (red); C: The cells were costained for nuclei (DAPI; blue) and  $\beta$ -catenin (red).

---

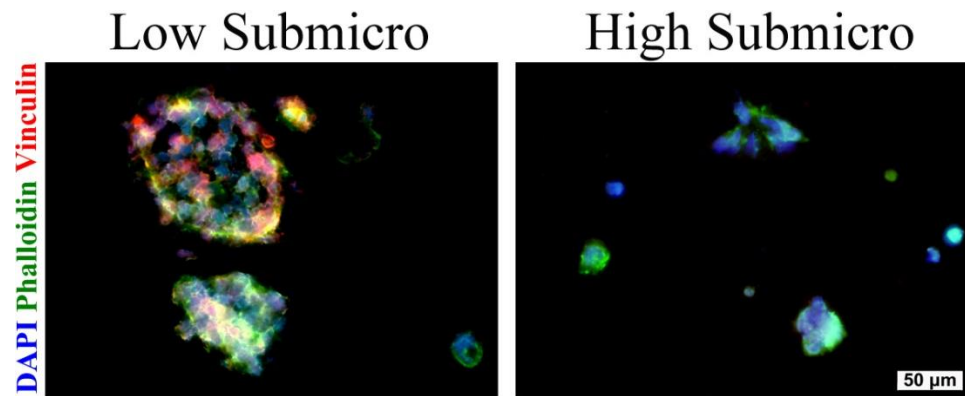

**Fig. 4** Immunofluorescence images of mESCs on the smooth Au and GNPLs with nanoscale and microscale surface roughnesses after culture of 3 days. The cells were costained for nuclei (DAPI; blue), cytoskeleton (Phalloidin; green) and vinculin (red).

---
